# Supplementary material for: Growth and assemblage dynamics of temperate forest tree species match physiological resilience to changes in atmospheric chemistry
Source: Research Square preprint supplement (doi:10.21203/rs.3.rs-4460514/v1), 2025-10-27
Supplement: Supplementary file 1 [file 92f60ecd54602ace84785b50.docx]

**Extended Data for**

Growth and assemblage dynamics of temperate forest tree species match physiological resilience to changes in atmospheric chemistry

Filip Oulehle1,2,*, Pavel Šamonil3,4, Otmar Urban2, Josef Čáslavský2,Alexander Ač2, Ivana Vašíčková3, Jakub Kašpar3, Pavel Hubený5, Rudolf Brázdil2,6, Miroslav Trnka2

1 Czech Geological Survey, 118 21 Prague, Czech Republic

2 Global Change Research Institute of the Czech Academy of Sciences, 603 00 Brno, Czech Republic

3 Department of Forest Ecology, The Silva Tarouca Research Institute, Brno, Czech Republic, Lidicka 25/27, 602 00 Brno

4 Faculty of Forestry and Wood Technology, Mendel University in Brno, Zemědělská 3, 613 00 Brno, Czech Republic

5 Šumava National Park, 1.máje 260, 385 01 Vimperk, Czech Republic

6 Institute of Geography, Masaryk University, 611 37 Brno, Czech Republic

*Filip Oulehle

**Email:**  filip.oulehle@geology.cz


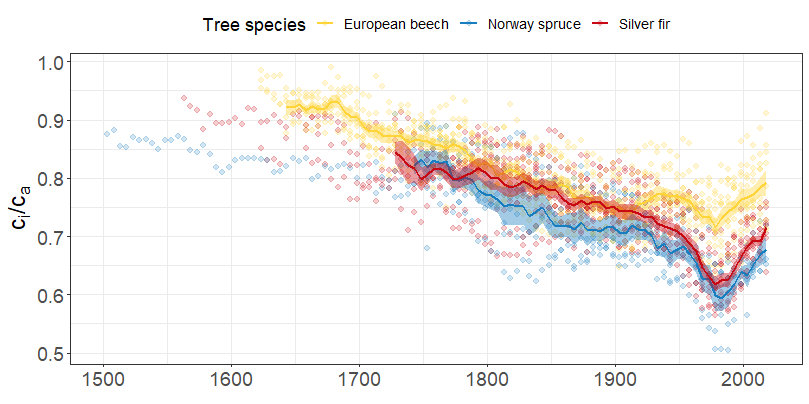
Fig. S1. Individual species-specific values (points) of the ratio of intercellular to ambient CO2 concentration (ci/ca) calculated for aggregated 5-year tree-ring segments. Points are fitted with a mean line starting in the year when the number of trees for each species reached at least 50% of all individuals analyzed. Shading corresponds to the standard error of the mean.


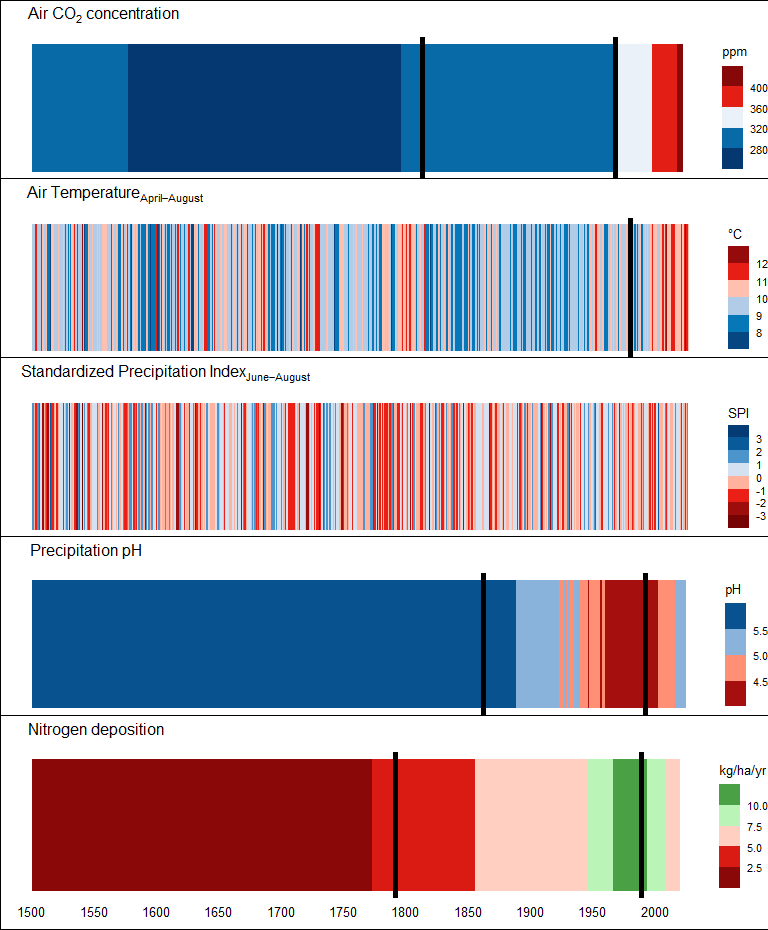
Fig. S2. Temporal patterns (1501-2020 CE) of environmental parameters with an indication of the years (vertical black line) when there was a significant change in the trend (identified by breakpoint analysis).


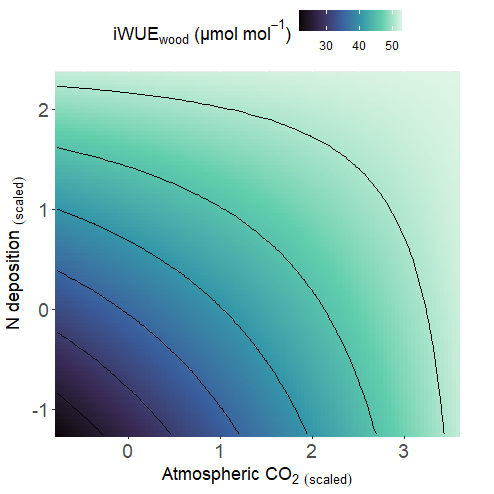


Fig. S3. Nature of the interaction between nitrogen (N) deposition and atmospheric CO2 on the intrinsic water-use efficiency (iWUE) of European beech trees. Values for each environmental factor were scaled by dividing the centred original values by their standard deviations. The parameter estimates for the interaction are presented in Table 1.


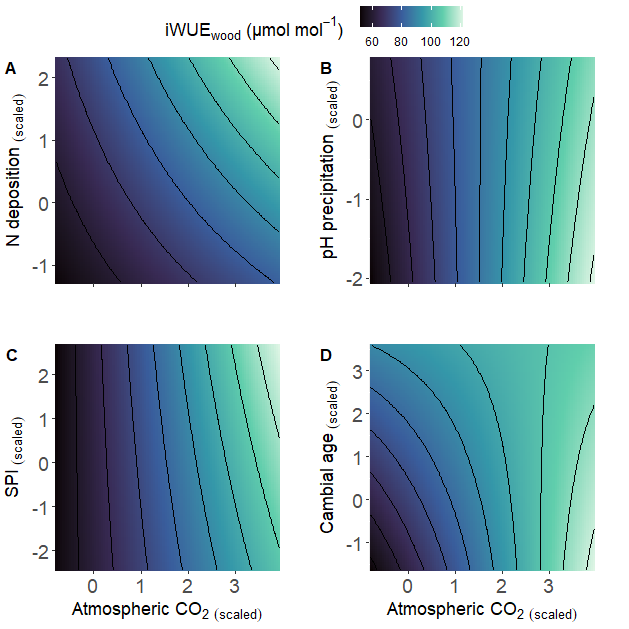


Fig. S4. Nature of the interactions between nitrogen (N) deposition and atmospheric CO2 (A), precipitation pH and atmospheric CO2 (B), June-August standardised precipitation index (SPIJun-Aug) and atmospheric CO2 (C) and cambial age and atmospheric CO2 (D) on intrinsic water-use efficiency (iWUE) in Norway spruce trees. Values for each environmental factor were scaled by dividing the centred original values by their standard deviations. The parameter estimates for the interaction are presented in Table 1.


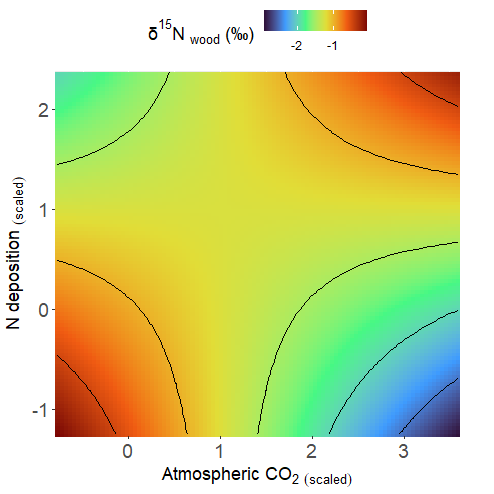


Fig. S5. Nature of the interaction between nitrogen (N) deposition and atmospheric CO2 on δ15Nwood in European beech trees. Values for each environmental factor were scaled by dividing the centred original values by their standard deviations. Parameter estimates for the interaction are presented in Table 2.


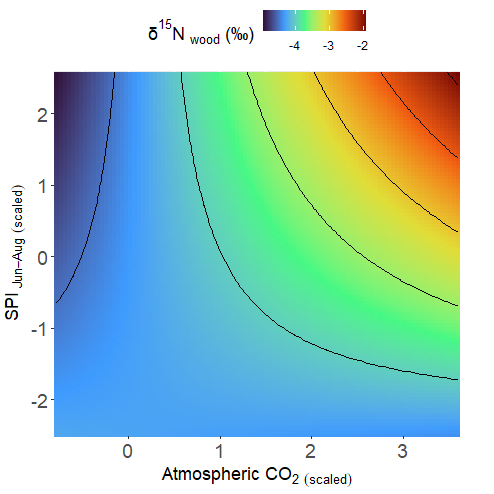


Fig. S6. Nature of the interaction between June-August standardised precipitation index (SPIJun-Aug) and atmospheric CO2 on δ15Nwood in Norway spruce trees. Values for each environmental factor were scaled by dividing the centred original values by their standard deviations. Parameter estimates for the interaction are presented in Table 2.


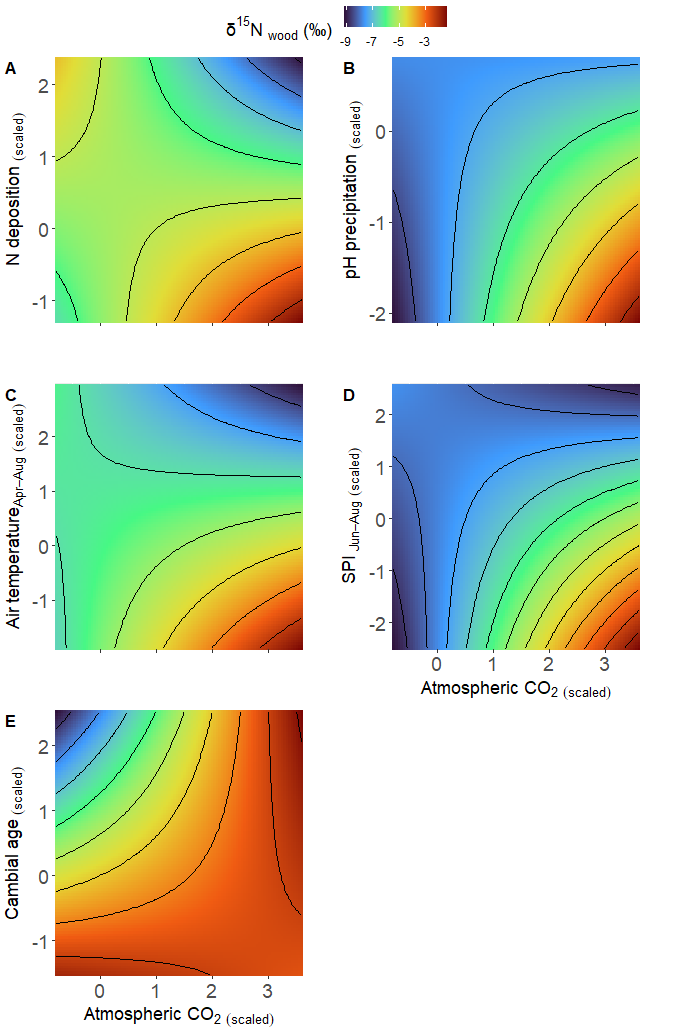


**Fig. S7.** Nature of the interactions between nitrogen (N) deposition and atmospheric CO2 (A), precipitation pH and atmospheric CO2 (B), April-August air temperature and atmospheric CO2 (C), June-August standardised precipitation index (SPIJun-Aug) and atmospheric CO2 (D), and cambial age and atmospheric CO2 (E) on δ15Nwood in Silver fir. Values for each environmental factor were scaled by dividing the centred original values by their standard deviations. Parameter estimates for the interaction are presented in Table 2.


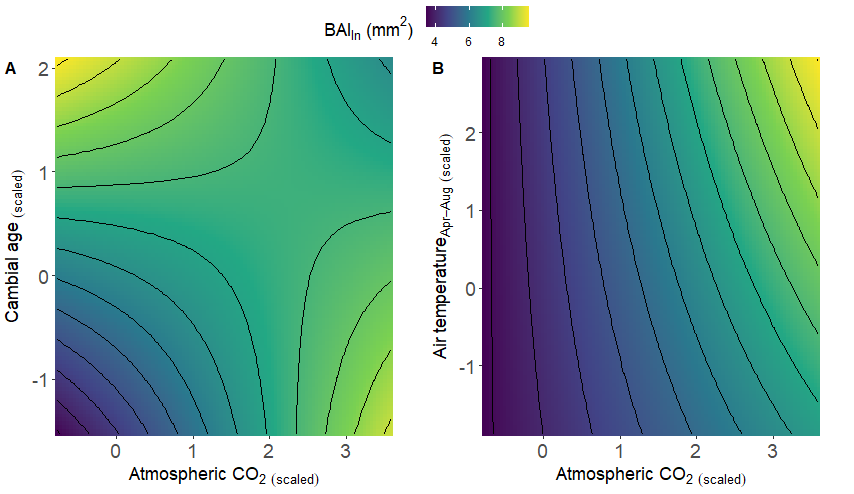


**Fig. S8.** Nature of the interactions between cambial age and atmospheric CO2 (A), April-August air temperature and atmospheric CO2 (B) on basal area increment (BAI) in European beech trees. The values for each environmental factor were scaled by dividing the centred original values by their standard deviations. Parameter estimates for the interaction are presented in Table 3.


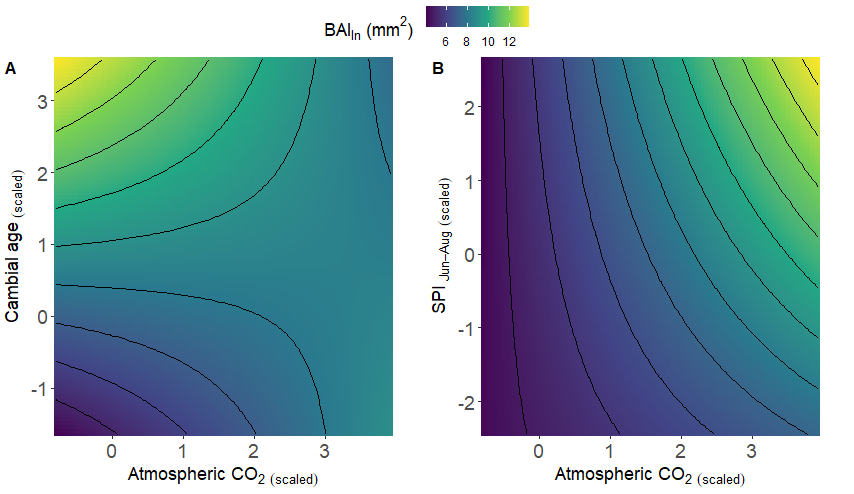


**Fig. S9.** Nature of the interactions between cambial age and atmospheric CO2 (A), June-August standardised precipitation index (SPIJun-Aug) and atmospheric CO2 (B) on basal area increment (BAI) in Norway spruce trees. The values for each environmental factor were scaled by dividing the centred original values by their standard deviations. The parameter estimates for the interaction are presented in Table 3.


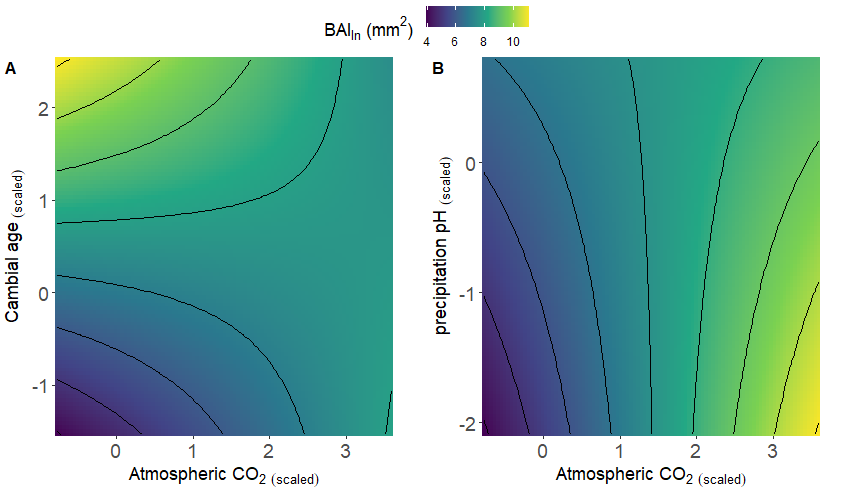


**Fig. S10.** Nature of the interactions between cambial age and atmospheric CO2 (A), precipitation pH and atmospheric CO2 (B) on basal area increment (BAI) in silver fir trees. The values for each environmental factor were scaled by dividing the centred original values by their standard deviations. The parameter estimates for the interaction are presented in Table 3.
